# Supplementary material
Source: PubMed Central journal article supplement (PMC2671696)
Supplement: tpc.108.061655_1.pdf [file tpc.108.061655_1.pdf]

Supplemental data. Zhao et al. (2009). The Wuschel-related homeobox gene *WOX11* is required to activate shoot-borne crown root development in rice.

A

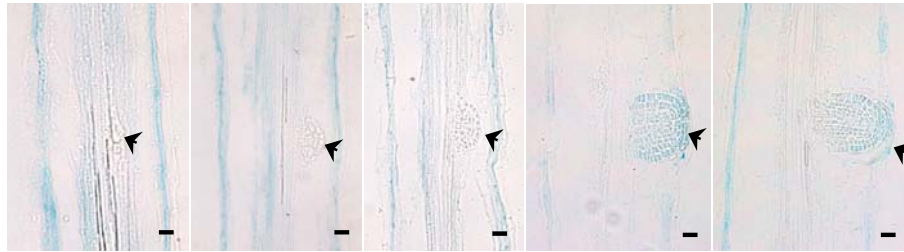

B

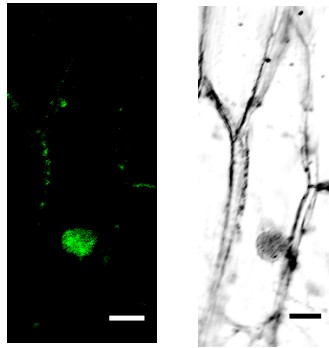

**Supplemental Figure 1.** Expression of WOX11p-GUS and Nuclear localization of WOX11-GFP protein

A. WOX11p-GUS expression during the course of lateral root initiation. GUS activity was detected after the initiation of the lateral roots. Bars=25 mm.

B. Fluorescence image of an onion epidermal cell expressing WOX11-GFP (left) merged with a bright-field image (right) Bar=50 mm.

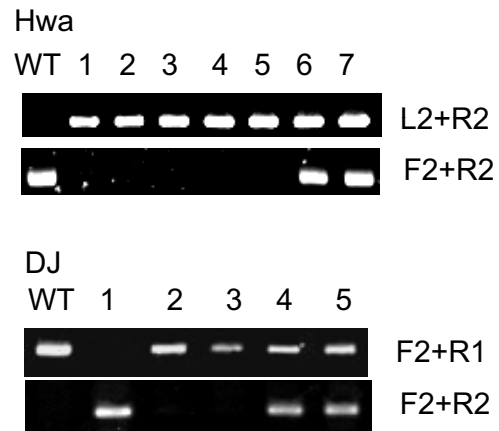

**Supplemental Figure 2.** Genotyping of the *WOX11* locus in *wox11-1* (upper panel) *wox11-2* (lower panel) and the respective wild type (Hwa and Dongjing). The primer sets used in the PCR tests are indicated on Fig. 2A and included in Supplemental Table 1 .

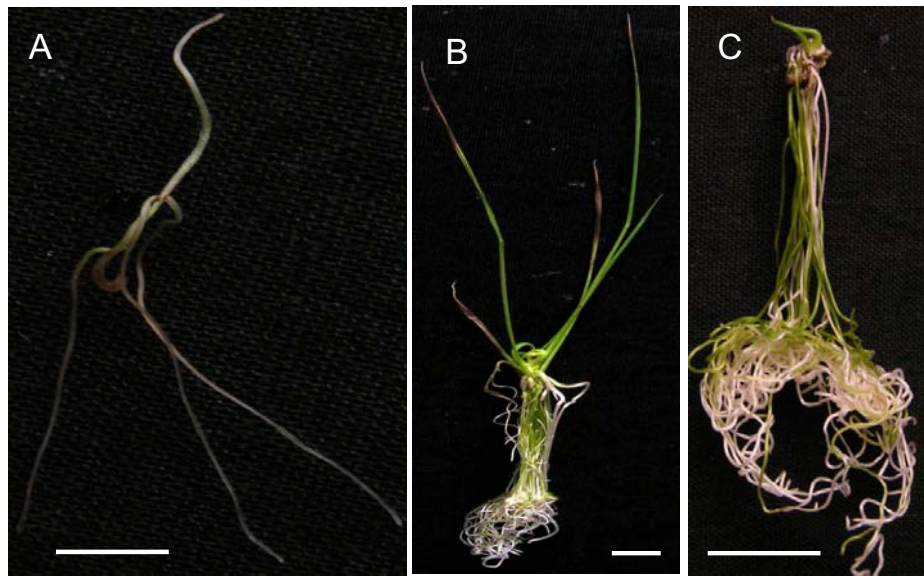

**Supplemental Figure 3.** Severe phenotypes found in the T0 population of *WOX11* over-expression plants. A. transgenic plant with the root-like shoot. B and C: transgenic plants with a reduced shoot but an extensively developed root system. Bars=2cm.

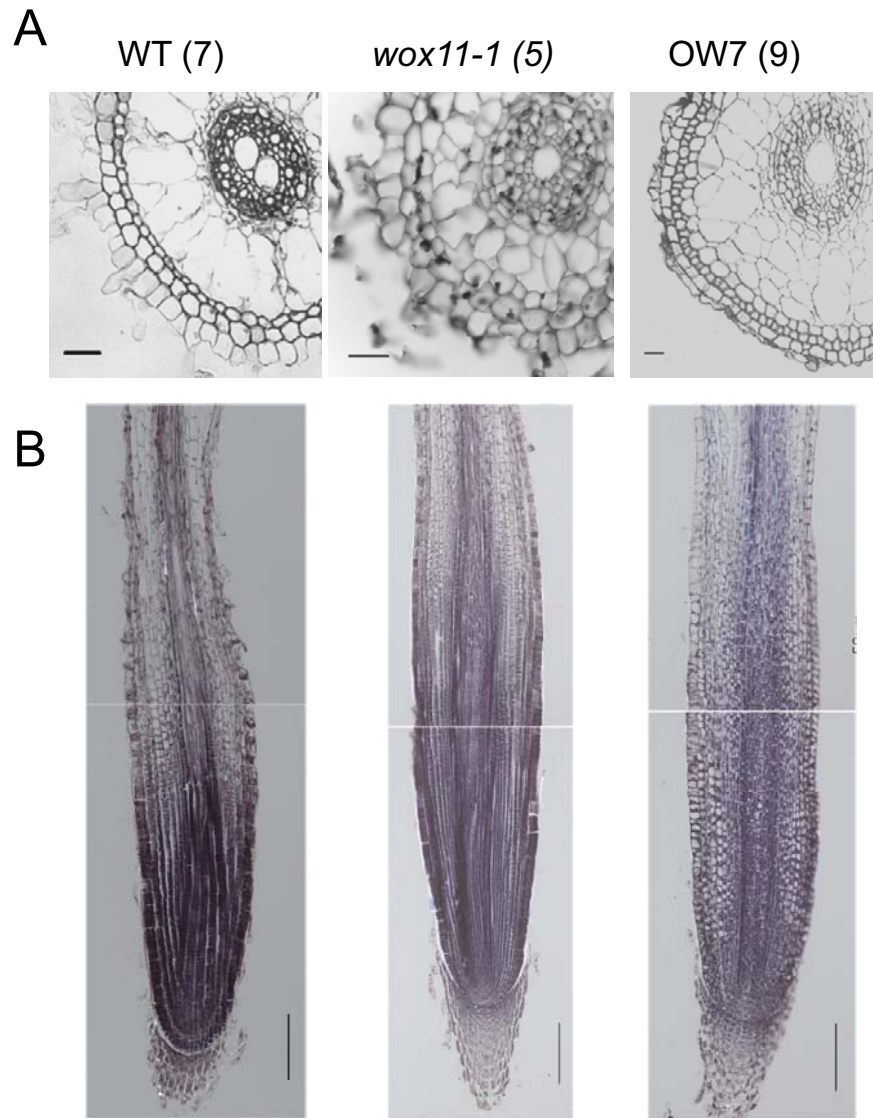

**Supplemental Figure 4.** Comparison of crown root cross (A) and longitudinal (B) sections of wild type (left), *wox11-1* mutant (middle) and over-expression (OW7) plants (right). Cell layers counted from the cortical and epidermal tissues in A are indicated in parentheses. Bar=25 mm in A, 50 mm in B.

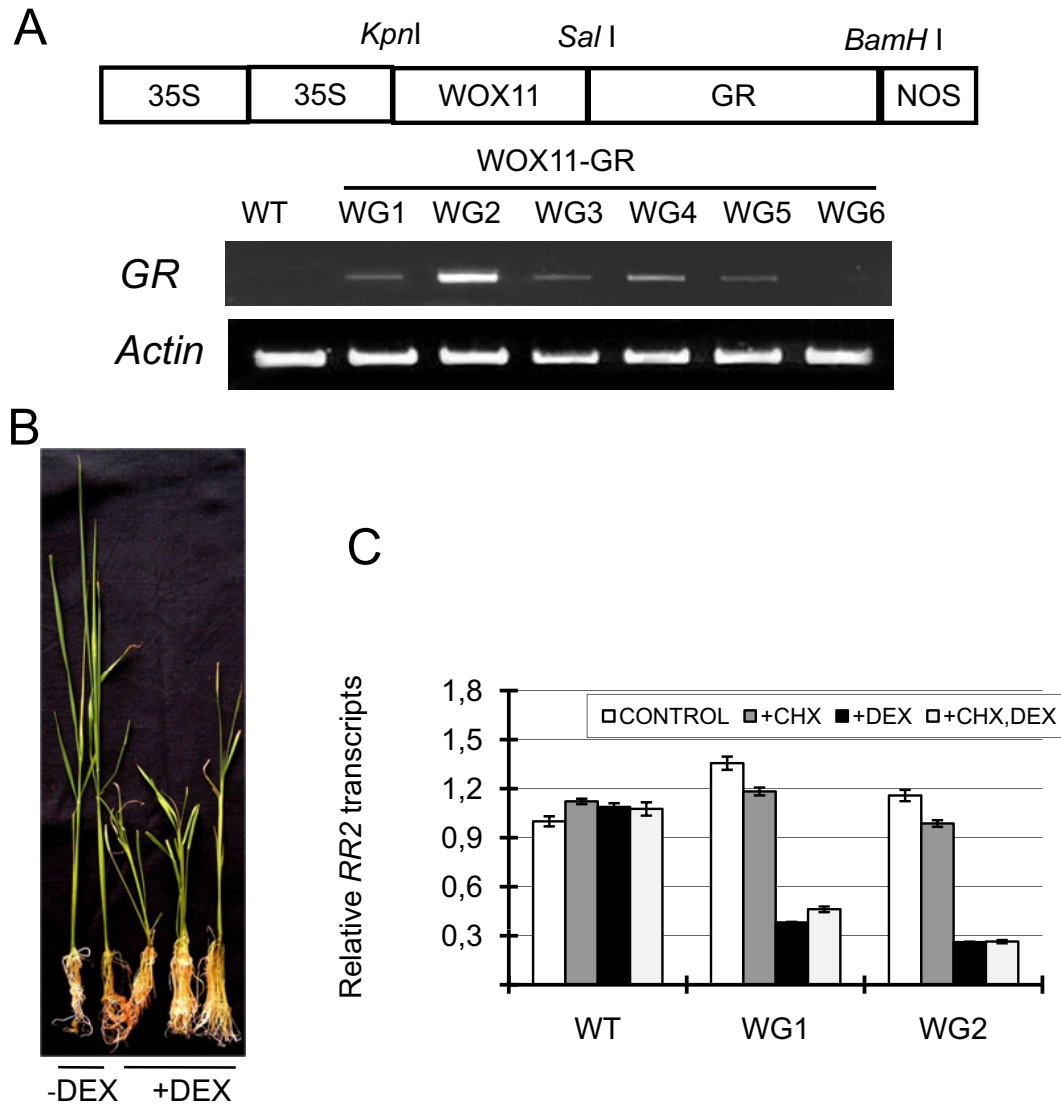

**Supplemental Figure 5.** Production of transgenic lines expressing the *WOX11-GR* fusion

- A. Identification of transgenic lines expressing the *WOX11-GR* fusion by RT-PCR. The binary vector containing the translation fusion between *WOX11* and the mouse glucocorticoid receptor (GR) under the control of the double CaMV35S promoter was used to produce transgenic plants. RT-PCR analysis revealed 5 *WOX11-GR*- expressing lines (WG1-5).
- B. *WOX11-GR* transgenic plants show extensive root production in the presence of DEX. The DEX was applied every 7 days for 4 times.
- C. Relative expression levels of *RR2* in wild type and in 3 *WOX11-GR* transgenic plants treated with or without DEX, CHX or DEX plus CHX. The transcript levels were normalized with the *actin* mRNA. The wild type control was assessed as 1. Bars are means  $\pm$  SD from 3 biological repeats.

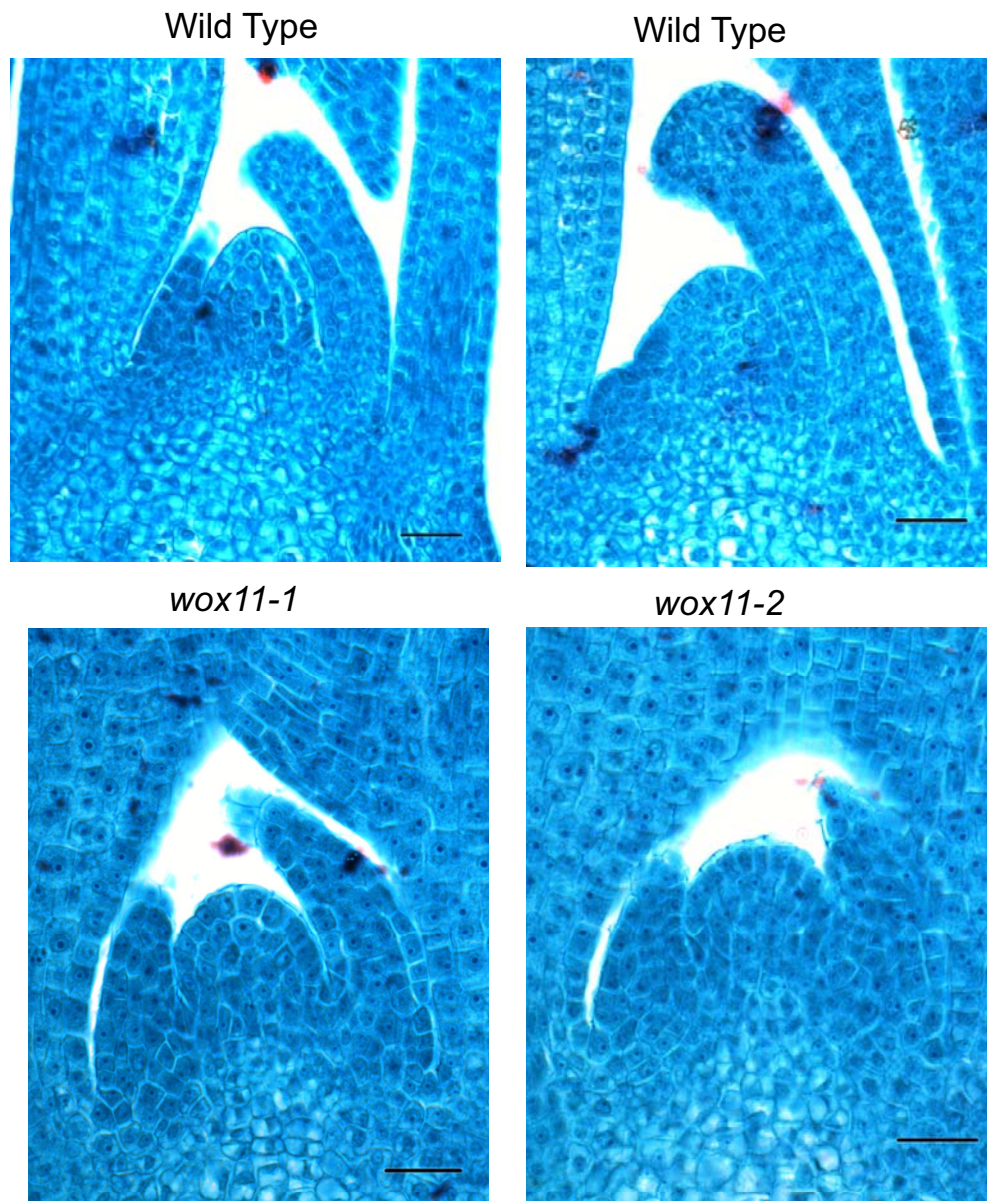

**Supplemental Figure 6.** Comparison of shoot longitudinal sections from wild type and *wox11* mutants. Shoot apices of 7-day old seedling were stained with hematoxylin, fixed in FAA and sectioned to 8  $\mu$ m thickness and photographed under a light microscope. Bar = 25  $\mu$ m.

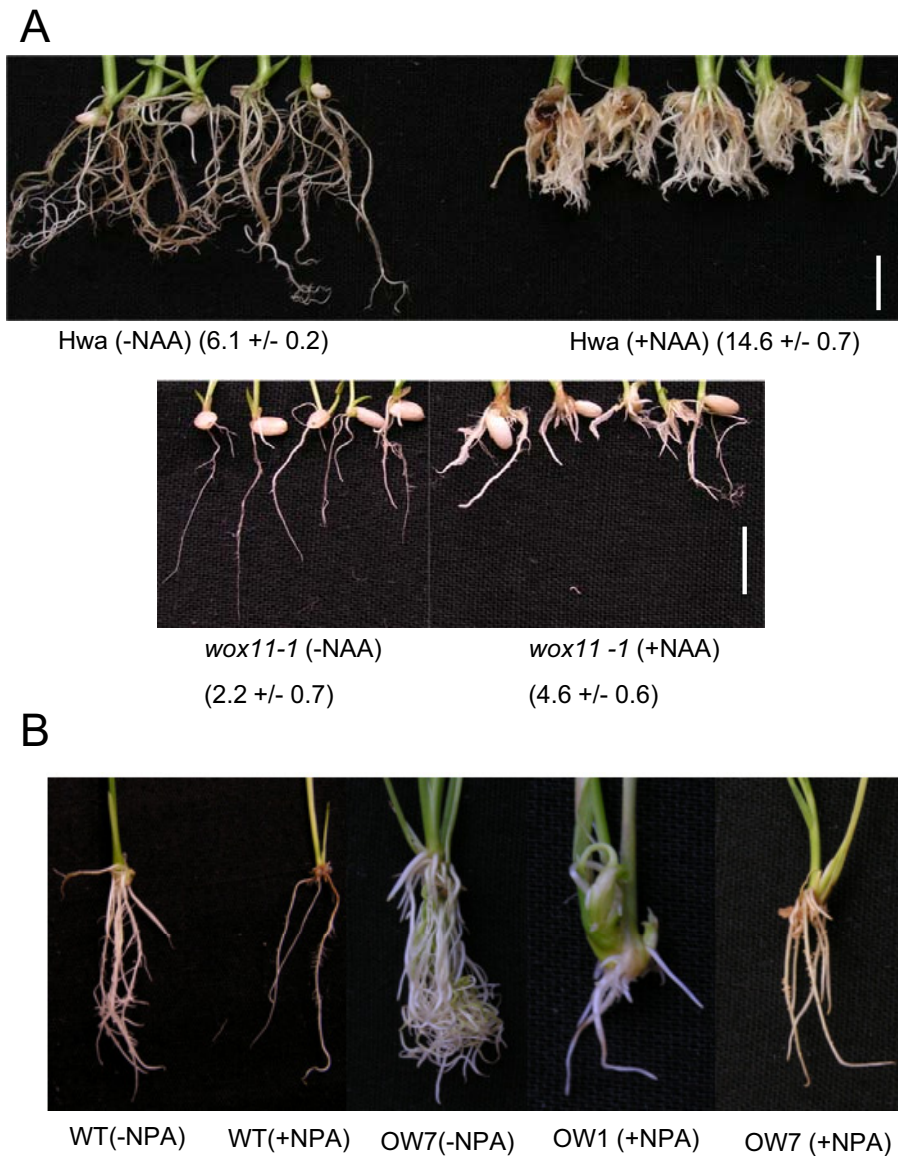

**Supplemental Figure 7.** Effect of auxin and an auxin inhibitor on crown root growth  
 A. The mutation of *wox11-1* impaired auxin induction of crown root production. Wild type (Hwa) and *wox11-1* were treated with or without NAA. Average root numbers and SD from 20 plants are indicated.  
 B. Inhibition of ectopic root production by NPA treatment on *WOX11* over-expression plants (OW) and normal crown root growth in wild type (WT). Bars= 1 cm.

**Supplemental Table 1: Primers used in the study.**

| Experiment                                                         | Primer name                              | Sequence                                                                          |
|--------------------------------------------------------------------|------------------------------------------|-----------------------------------------------------------------------------------|
| <i>wox11</i> T-DNA mutant characterization                         | F2                                       | 5'GGCTGATACTAGCTAGGACACTGA                                                        |
|                                                                    | R2                                       | 5'CTCAACTCGATCAAGACGACCT                                                          |
|                                                                    | L2                                       | 5'CTAGAGTCGAGAATTCAGTACA                                                          |
|                                                                    | R1                                       | 5'CCACAGTTTTTCGCGATCCAGACTG                                                       |
| RT-PCR analysis of <i>WOX11</i> expression in <i>wox11</i> mutants | F3                                       | 5'AACAGCGGCATGGTGAACCC                                                            |
|                                                                    | R3                                       | 5'GCCACGATGAGGACGACGAG                                                            |
|                                                                    | <i>Actin-F</i><br><i>Actin-R</i>         | 5'CTCAACCCCAAGGCTAACAG<br>5'ACCTCAGGGCATCGGAAC                                    |
| Vector constructions                                               | <i>OXWOX11-F</i><br><i>OXWOX11-R</i>     | 5'GGGGGTACGCGAGCTCTAGGTGTTTCGAC<br>5'GGGGGATCCATCGACGAATCGCTCAACTC                |
|                                                                    | <i>WOX11gus-F</i><br><i>WOX11gus-R</i>   | 5'GGGGTTCGACCCCAATCAAATGCTCTGCC<br>5'GGGGGATCCCTGCCTTGTTCGGTGTCTGA                |
|                                                                    | <i>WOX11RNAi-F</i><br><i>WOX11RNAi-R</i> | 5'GGGACTAGTGGTACCCGACACCGAACAAGGC<br>5'GGGGAGCTCGGATCCCGAGGAGATCCCGAC             |
|                                                                    | <i>WOX11gfp-F</i><br><i>WOX11gfp-R</i>   | 5'GGGGGTACCGACACCGAACAAGGCAGCTA<br>5'GGGGGATCCAGACGACCTCGTGACCAGG                 |
|                                                                    | <i>WOX11gr-F</i><br><i>WOX11gr-R</i>     | 5'GGGGGTACCGACACCGAACAAGGCAGCTA<br>5'GGGGTTCGACAGACGACCTCGTGACCAGG                |
|                                                                    | <i>GR-F</i><br><i>GR-R</i>               | 5'GTCGACAGATCCTGAAGCTCGAAAAAC<br>5'GGATCCACCGGCAACAGGATTCAATG                     |
|                                                                    | <i>WOX1132a-F</i><br><i>WOX1132a -R</i>  | 5'ACAGGTACCGACGACGACGACAAGATGGACGGCGGCCACAGC<br>5'ACAGGATCCTCAAGACGACCTCGTGACCAGG |
|                                                                    | Realtime PCR                             | <i>RR1-F</i><br><i>RR1-R</i>                                                      |
| <i>RR2-F</i><br><i>RR2-R</i>                                       |                                          | 5'ACGATCTTCTCAAAGCCATCAAG<br>5'TGAGAGGCTTAAGGATGAAATCCT                           |
| <i>RR3-F</i><br><i>RR3-R</i>                                       |                                          | 5'AGGGTTCGATCTCCTCAAGAG<br>5'GAATTCTCCGACGACATTAGC                                |
| <i>RR5-F</i><br><i>RR5-R</i>                                       |                                          | 5'ACCGAATGTGAGCATGATTATCA<br>5'CCTTGACCTTCTCAGGAGTTCATA                           |
| <i>RR6-F</i><br><i>RR6-R</i>                                       |                                          | 5'GTCCCAACGTCAACATGATC<br>5'CACGTTCTCCGACGACATGAT                                 |
| <i>RR7-F</i><br><i>RR7-R</i>                                       |                                          | 5'TGCTCAAGAAGATCAAGGAATCG<br>5'GGCACGTTCTCTGACGACATTAT                            |
| <i>IAA5-F</i>                                                      |                                          | 5'GAAATTGAAAATCATGAGAGGATCTG                                                      |



|                              |                    |                                     |
|------------------------------|--------------------|-------------------------------------|
|                              | <i>IAA5-R</i>      | 5'TGCTCTGCCCTGACTGCTCTA             |
|                              | <i>IAA11-F</i>     | 5'CGACGTCGCCATGTACAAGA              |
|                              | <i>IAA11-R</i>     | 5'TGGTGAAGGAGGTGAACATGTT            |
|                              | <i>IAA23-F</i>     | 5'TGCCCACCTACGAGGACAAG              |
|                              | <i>IAA23-R</i>     | 5'TTGCAGGACTCGACGAACATC             |
|                              | <i>IAA31-F</i>     | 5'CGACGTCCCATTCGAGATGT              |
|                              | <i>IAA31-R</i>     | 5'TTGCTCCTAGGCCTCTTGCTT             |
|                              | <i>WOX11-F(rq)</i> | 5'CCAGATGGGCGAGAGCTACT              |
|                              | <i>WOX11-R(rq)</i> | 5'CGTTGCCATCGATCAATCAA              |
|                              | <i>Actin-F(rq)</i> | 5'TGTATGCCAGTGGTCGTACCA             |
|                              | <i>Actin-R(rq)</i> | 5'CCAGCAAGGTCGAGACGAA               |
| <i>In situ</i> hybridization | <i>RR2situ-F</i>   | 5'GGGACTAGTGGTACCGTCGTCGGAGAATGAGCC |
|                              | <i>RR2situ-R</i>   | 5'GGGGAGCTCGGATCCGACCATCTGTGCAGGAGC |
| Gel shift assays             | S1-F               | 5'GACCCCCGGCGATTTAATGGTTAATTAA      |
|                              | S1-R               | 5'TAATTAACCATTAAATCGCCGGGGGT        |
|                              | S2-F               | 5'GACCCCCGGCGATCCCGGGTTAATTAA       |
|                              | S2-R               | 5'TTAATTAACCCGGGATCGCCGGGGGTC       |
| ChIP                         | P1-F               | 5' CGCCTTAGGCTTCATCAATC             |
|                              | P1-R               | 5'TATTGGCATCGACGTGGTTA              |
|                              | P2-F               | 5'CGGATAGTTGTCTGAATTG               |
|                              | P2-R               | 5'GAATTCAACTGTGCGATG                |
|                              | P3-F               | 5'CATCGCACAGTTGAATTC                |
|                              | P3-R               | 5'CGTGAGGTAGTACACACGG               |
|                              | P4-F               | 5'GCCAATACAATAACCAT                 |
|                              | P4-R               | 5'GAGGGAAATTCAAGATA                 |
